# Supplementary material for: Unleashing the potential of Li–O2 batteries with electronic modulation and lattice strain in pre-lithiated electrocatalysts
Source: PubMed Central journal article supplement — Chem Sci. 2024 Jul 22;15(33):13209–17. doi: 10.1039/d4sc03242j (PMC11339796; doi:10.1039/d4sc03242j), 2024-07-22
Supplement: SC-015-D4SC03242J-s001.pdf [file SC-015-D4SC03242J-s001.pdf]

Electronic Supplementary Information (ESI)

## **Unleashing the Potential of Li-O<sub>2</sub> Batteries with Electronic Modulation and Lattice Strain in Pre-Lithiated Electrocatalysts**

Zhengcai Zhang,<sup>a†</sup> Dulin Huang,<sup>a†</sup> Shuochao Xing,<sup>a</sup> Minghui Li,<sup>a</sup> Jing Wu,<sup>a</sup> Zhang Zhang,<sup>a</sup> Yaying Dou,<sup>a,b\*</sup> Zhen Zhou<sup>a\*</sup>

1. Interdisciplinary Research Center for Sustainable Energy Science and Engineering (IRC4SE<sup>2</sup>), School of Chemical Engineering, Zhengzhou University, Zhengzhou 450001, China
2. Key Laboratory of Advanced Energy Materials Chemistry (Ministry of Education), College of Chemistry, Nankai University, Tianjin 300071, China

\*Corresponding Author(s): Yaying Dou: [yydou@zzu.edu.cn](mailto:yydou@zzu.edu.cn).

Zhen Zhou: [zhenzhou@zzu.edu.cn](mailto:zhenzhou@zzu.edu.cn)

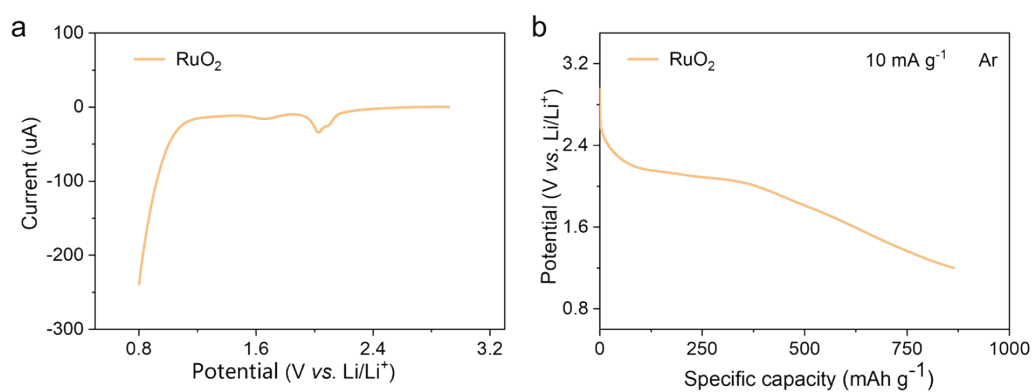

Fig. S1 (a) LSV curves of RuO<sub>2</sub> with a scan rate of 0.05 mV s<sup>-1</sup> and (b) discharge profile of RuO<sub>2</sub> at a current density of 10 mA g<sup>-1</sup>.

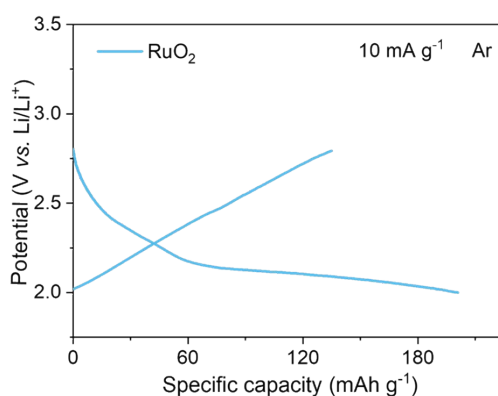

Fig. S2 The initial discharge-charge potential profiles of RuO<sub>2</sub> as the work electrode with Li metal as the counter electrode at a current density of 10 mA g<sup>-1</sup>.

The theoretical specific capacity of RuO<sub>2</sub> is approximately 201 mAh g<sup>-1</sup>, corresponding to the insertion of 1 mol of Li<sup>+</sup> into 1 mol of RuO<sub>2</sub>. As shown in Figure S2, the coulombic efficiency of the 1st cycle is ~ 65%, indicating 35% irreversible capacities occurred during the lithiation, which mainly corresponds to Li<sup>+</sup> without inserting RuO<sub>2</sub>. In this case, we assume that the coulombic efficiency is the same when the RuO<sub>2</sub> electrode is cycled between different voltage windows. Discharge experiments were conducted at a current density of 10 mA g<sup>-1</sup> for 4, 8, 12, and 16 hours, resulting in specific capacities of 40, 80, 120, and 160 mAh g<sup>-1</sup>, respectively. Considering the 35% irreversible capacities occurred during the lithiation, the Li<sup>+</sup> concentration (x) in Li<sub>x</sub>RuO<sub>2</sub> was determined to be 0.13, 0.27, 0.39, and 0.52, respectively. Importantly, even after 16h discharge, the terminal voltage remained above 2 V, indicating continuous lithium intercalation throughout the entire process.

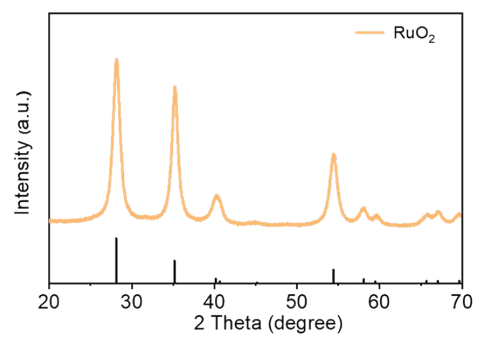

Fig. S3 XRD patterns of pristine RuO<sub>2</sub>.

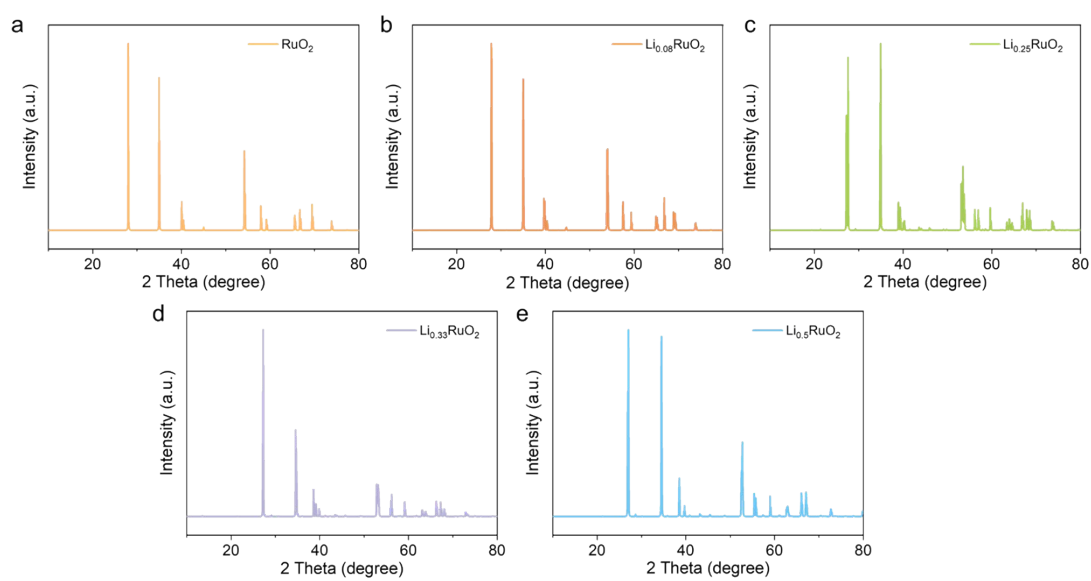

Fig. S4 Simulated XRD diffraction patterns of  $\text{Li}_x\text{RuO}_2$  with different  $\text{Li}^+$  concentrations based on theoretical calculations.

Tab. S1 Lattice parameters of the  $\text{Li}_x\text{RuO}_2$  obtained by DFT calculations.

| Samples                        | Lattice constant (Å)      | Volume (Å <sup>3</sup> ) |
|--------------------------------|---------------------------|--------------------------|
| $\text{RuO}_2$                 | a=b=4.501, c=3.120        | 63.21                    |
| $\text{Li}_{0.08}\text{RuO}_2$ | a=4.52, b=4.542, c=3.111  | 63.87                    |
| $\text{Li}_{0.25}\text{RuO}_2$ | a=4.584, b=4.624, c=3.097 | 65.65                    |
| $\text{Li}_{0.33}\text{RuO}_2$ | a=4.601, b=4.662, c=3.121 | 66.95                    |
| $\text{Li}_{0.5}\text{RuO}_2$  | a=4.669, b=4.676, c=3.128 | 68.29                    |

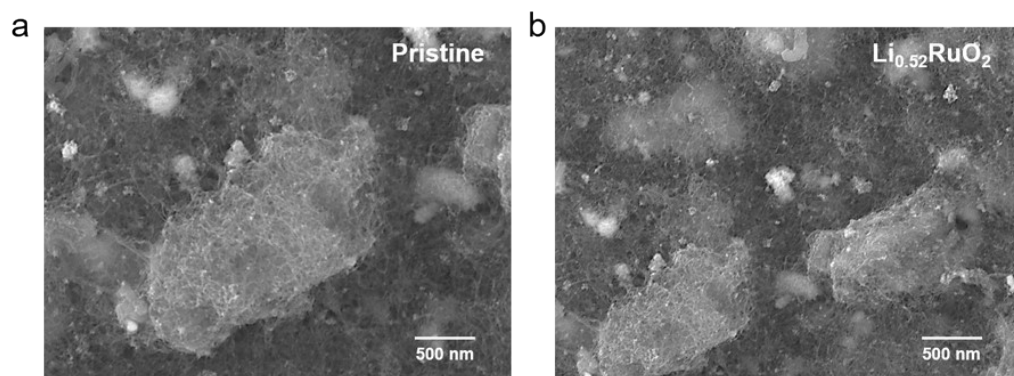

Fig. S5 SEM images of (a) pristine  $\text{RuO}_2$  and (b)  $\text{Li}_{0.52}\text{RuO}_2$  electrodes.

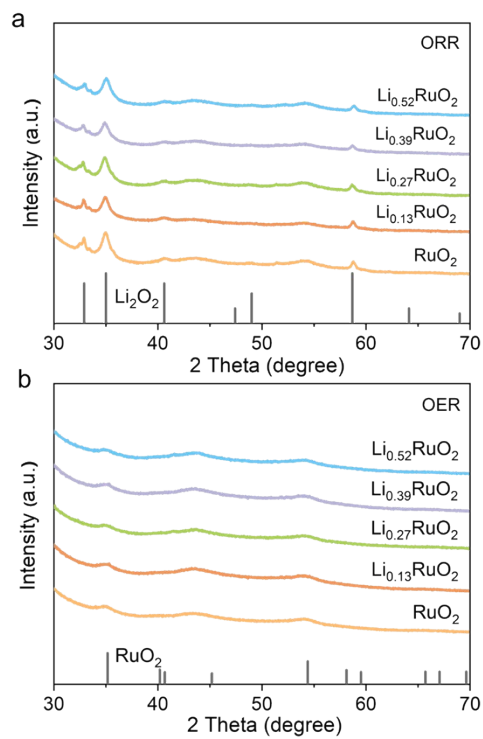

Fig. S6 XRD patterns of Li-O<sub>2</sub> batteries with RuO<sub>2</sub> and Li<sub>x</sub>RuO<sub>2</sub> cathodes after discharge (a) and recharge (b).



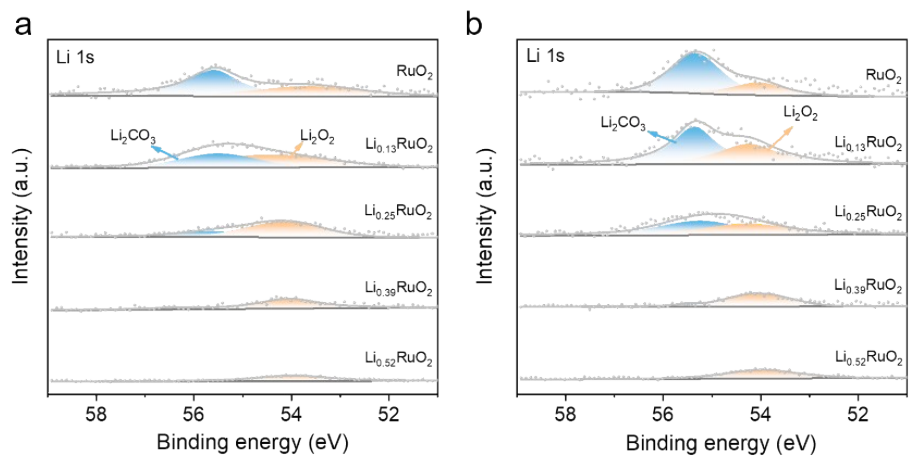

Fig. S7 Li 1s XPS of oxygen cathodes after the 1st (a) and 10th (b) recharge.

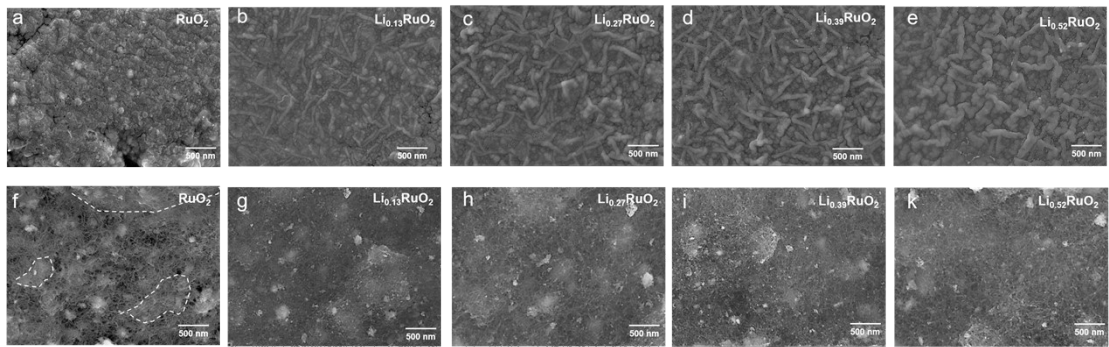

Fig. S8 SEM images of Li-O<sub>2</sub> batteries with RuO<sub>2</sub> and Li<sub>x</sub>RuO<sub>2</sub> cathodes after discharge (a-e) and recharge (f-k).

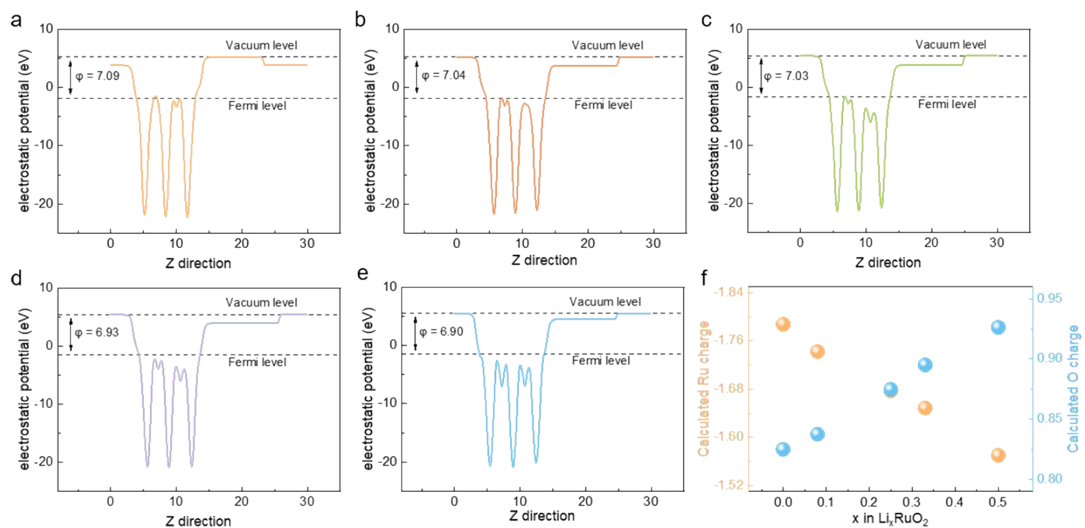

Fig. S9 (a-e) The electrostatic potential and work function on the catalyst surface of  $\text{Li}_x\text{RuO}_2$  ( $x=0, 0.08, 0.25, 0.33, 0.5$ ) embedded at different Li concentrations. (f) The electron transfer of Ru and O in the catalyst  $\text{Li}_x\text{RuO}_2$  with different  $\text{Li}^+$  concentrations.

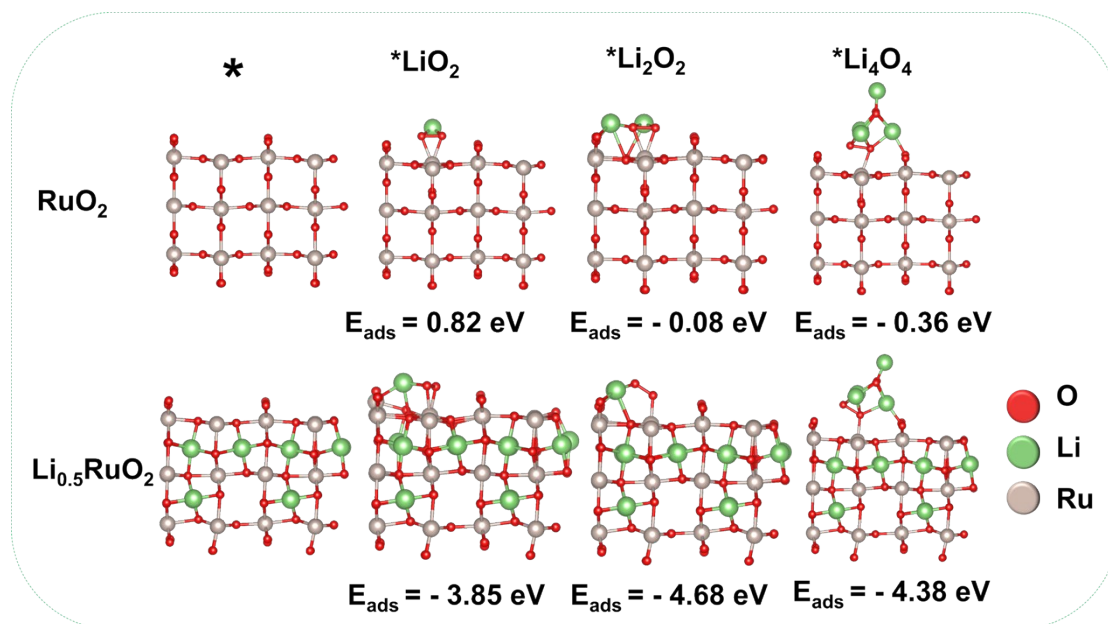

Fig. S10 The structure models and corresponding adsorption energies of various Li-O species on  $\text{RuO}_2$  and  $\text{Li}_{0.5}\text{RuO}_2$  (110) planes.

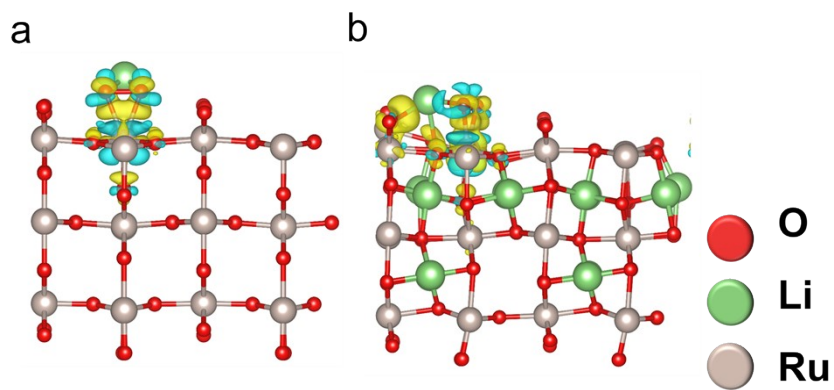

Fig. S11 Charge density difference plots of  $\text{LiO}_2$  on (a)  $\text{RuO}_2$  (110) or (b)  $\text{Li}_{0.5}\text{RuO}_2$  (110), with yellow denoting the increased charge and cyan the decreased charge.

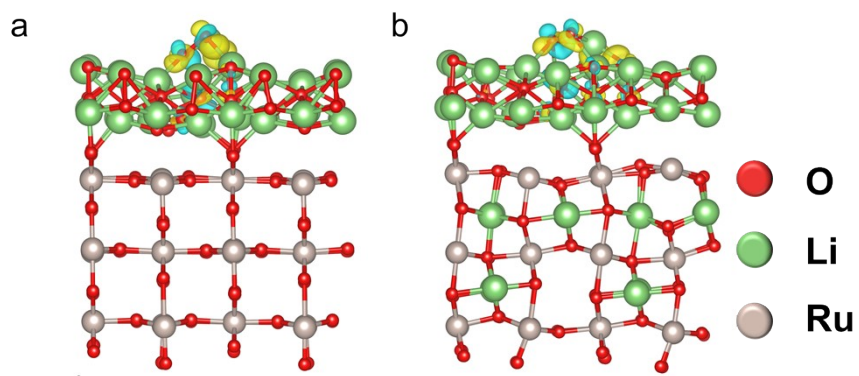

Fig. S12 Charge density difference plots of  $\text{LiO}_2$  on (a)  $\text{RuO}_2$  (110) or (b)  $\text{Li}_{0.5}\text{RuO}_2$  (110) covered by  $\text{Li}_2\text{O}_2$ , with yellow denoting the increased charge and cyan the decreased charge.
